# Supplementary material for: Coffee Polyphenol, Chlorogenic Acid, Suppresses Brain Aging and Its Effects Are Enhanced by Milk Fat Globule Membrane Components
Source: MDPI journal article supplement (doi:10.3390/ijms23105832), 2022-05-23
Supplement: s1 [file s1]

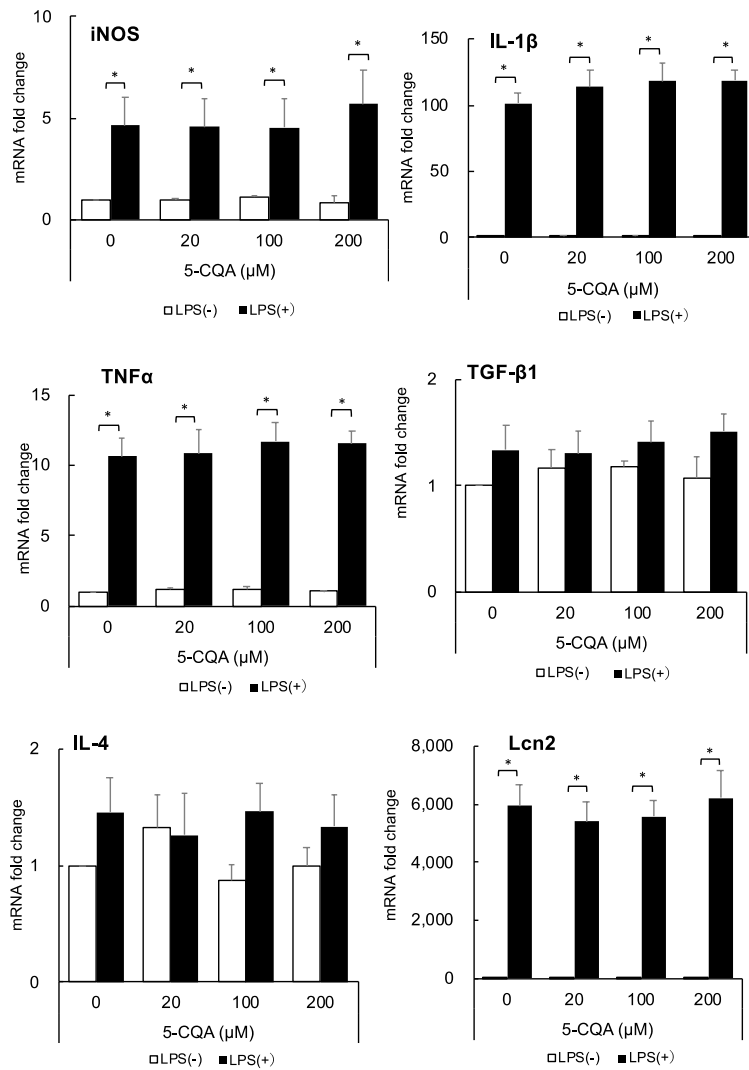

**Supplementary Figure S1.** Effect of 5-CQA on BV2 cells treated with LPS. Each value represents the mean  $\pm$  SEM ( $n = 3-5$ , \*,  $p < 0.05$ , Fisher's least significant difference test).

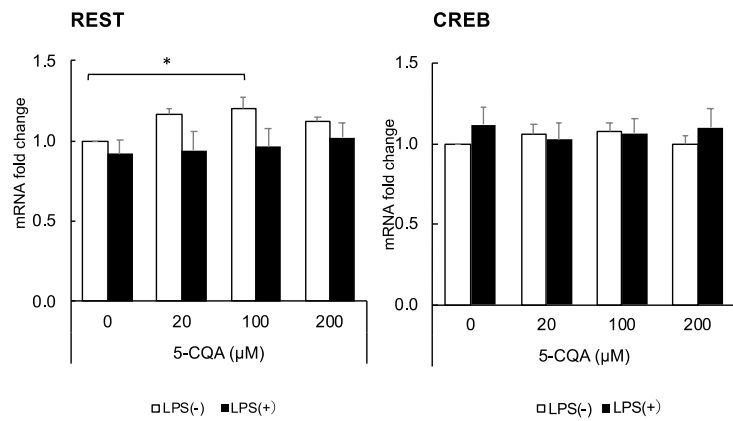

**Supplementary Figure S2.** Effect of 5-CQA on REST and CREB expression in BV2 cells. Each value represents the mean  $\pm$  SEM ( $n = 3-5$ , \*,  $p < 0.05$ , Fisher's least significant difference test).

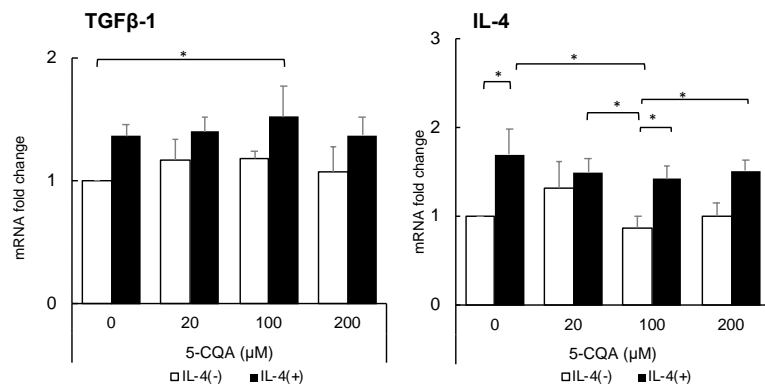

**Supplementary Figure S3.** Effect of 5-CQA on BV2 cells treated with IL4. Each value represents the mean  $\pm$  SEM ( $n = 3-5$ , \*,  $p < 0.05$ , Fisher's least significant difference test).
